# Supplementary material for: A new mechanistic insight on β-lactam systems formation from 5-nitroisoxazolidines
Source: Royal Society of Chemistry journal article supplement (doi:10.1039/c5ra07663c), 2015-01-01
Supplement: c5ra07663c1.pdf [file c5ra07663c1.pdf]

## ELECTRONIC SUPPORTING INFORMATION

---

### A new mechanistic insight on $\beta$ -lactam systems formation from 5-nitroisoxazolidines

Radomir Jasiński

Cracow University of Technology, Institute of Organic Chemistry and Technology,  
Warszawska 24, 31-155 Cracow  
e-mail: radomir@chemia.pk.edu.pl

---

#### [1] Computational details

All calculations reported in this thesis were performed on an SGI-Altix 3700 computer in the CYFRONET regional computational centre in Cracow. Hybrid functional B3LYP [S1] with the 6-31G(d) basis set included in the GAUSSIAN 09 [S2] package was used. Subsequently, similar simulations using more advanced B3LYP/6-31G(d,p), B3LYP/6-31+G(d) as well as B3LYP/6-31++G(d) theoretical levels were performed. For the calculations of solvent effect on the reaction paths, the polarizable continuum model (PCM), in which the cavity is created via a series of overlapping spheres, was used.

Transition states were calculated using the QST2 (or QST3) and TS procedures. Subsequently, transition states were localized out by changing gradually the distance between the centers (with optimization after each step). In this way transition states identical as previously have been obtained. Stationary points were characterized by frequency calculations. All reactants, and products, had positive Hessian matrices. All transition states showed only one negative eigenvalue in their diagonalized Hessian matrices, and their associated eigenvectors were confirmed to correspond to the motion along the reaction

coordinate under consideration. For all reactions, intrinsic reaction coordinate (IRC) calculations were performed to connect previously computed transition structures (TS) with suitable minima.

## [2] Selected results of quantumchemical calculations

### Energetic aspects

**Table ESI-01.** Kinetic and thermodynamic parameters for conversion of 3,4-*trans*-4,5-*trans*-2-methyl-3-phenyl-4-cyano-5-nitroisoxazolidine (**1a**) into 3,4-*trans*-1-methyl-3-cyano-4-phenyl-2-azetidinone (**2a**) in methanol solution according to DFT calculations (T = 298 K;  $\Delta H$ ,  $\Delta G$  in kcal/mol;  $\Delta S$  in cal/molK)

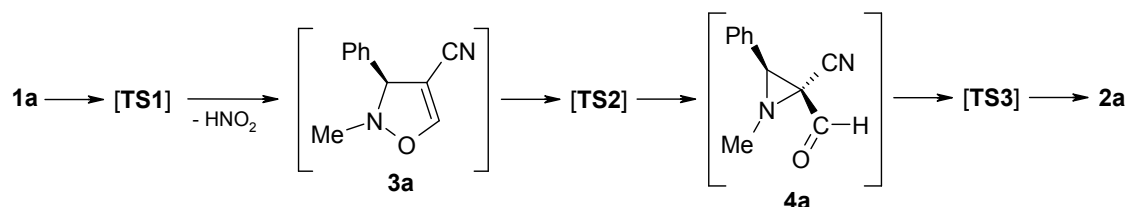

| Theory level     | Transition                              | $\Delta H$ | $\Delta G$ | $\Delta S$ |
|------------------|-----------------------------------------|------------|------------|------------|
| B3LYP/6-31G(d)   | <b>1a</b> → <b>TS1</b>                  | 28.7       | 28.2       | 1.7        |
|                  | <b>1a</b> → <b>3a</b> +HNO <sub>2</sub> | 9.7        | -3.5       | 44.4       |
|                  | <b>3a</b> → <b>TS2</b>                  | 32.4       | 32.0       | 1.2        |
|                  | <b>3a</b> → <b>4a</b>                   | -14.8      | -15.1      | 1.3        |
|                  | <b>4a</b> → <b>TS3</b>                  | 71.7       | 71.8       | -0.3       |
|                  | <b>4a</b> → <b>2a</b>                   | -31.9      | -32.2      | 1.2        |
| B3LYP/6-31G(d,p) | <b>1a</b> → <b>TS1</b>                  | 27.1       | 26.9       | 0.8        |
|                  | <b>1a</b> → <b>3a</b> +HNO <sub>2</sub> | 7.4        | -5.7       | 43.9       |
|                  | <b>3a</b> → <b>TS2</b>                  | 32.3       | 31.9       | 1.3        |
|                  | <b>3a</b> → <b>4a</b>                   | -14.8      | -15.1      | 1.2        |
|                  | <b>4a</b> → <b>2a</b>                   | -31.8      | -32.2      | 1.2        |
| B3LYP/6-31+G(d)  | <b>1a</b> → <b>TS1</b>                  | 25.5       | 23.0       | 8.5        |
|                  | <b>1a</b> → <b>3a</b> +HNO <sub>2</sub> | 5.9        | -9.0       | 50.1       |
|                  | <b>3a</b> → <b>TS2</b>                  | 30.5       | 30.6       | -0.1       |
|                  | <b>3a</b> → <b>4a</b>                   | -14.7      | -15.1      | 1.2        |
|                  | <b>4a</b> → <b>2a</b>                   | -33.3      | -33.4      | 0.4        |
| B3LYP/6-31++G(d) | <b>1a</b> → <b>TS1</b>                  | 25.6       | 23.0       | 8.5        |
|                  | <b>1a</b> → <b>3a</b> +HNO <sub>2</sub> | 5.9        | -9.0       | 50.0       |
|                  | <b>3a</b> → <b>TS2</b>                  | 30.6       | 30.6       | 0.0        |
|                  | <b>3a</b> → <b>4a</b>                   | -14.7      | -15.0      | 1.2        |
|                  | <b>4a</b> → <b>2a</b>                   | -33.3      | -33.5      | 0.6        |

**Cartesian coordinates for key structures of conversion of 3,4-*trans*-4,5-*trans*-2-methyl-3-phenyl-4-cyano-5-nitroisoxazolidine (1a) into 3,4-*trans*-1-methyl-3-cyano-4-phenyl-2-azetidinone (2a) in methanol solution according to B3LYP/6-31G(d) calculations**

[TS1]

| Center Number | Atomic Number | Atomic Type | Coordinates (Angstroms) |           |           |
|---------------|---------------|-------------|-------------------------|-----------|-----------|
|               |               |             | X                       | Y         | Z         |
| 1             | 6             | 0           | -0.958437               | -0.285758 | 0.958540  |
| 2             | 6             | 0           | -2.126043               | -0.908335 | 0.405925  |
| 3             | 8             | 0           | -1.885698               | -1.606002 | -0.657376 |
| 4             | 7             | 0           | -0.465295               | -1.352632 | -1.054658 |
| 5             | 6             | 0           | 0.202168                | -1.020123 | 0.232407  |
| 6             | 6             | 0           | 1.467064                | -0.221408 | -0.005500 |
| 7             | 6             | 0           | 2.649814                | -0.616566 | 0.629745  |
| 8             | 6             | 0           | 1.477576                | 0.905247  | -0.841025 |
| 9             | 6             | 0           | 3.828691                | 0.109433  | 0.444338  |
| 10            | 6             | 0           | 2.656766                | 1.624886  | -1.029614 |
| 11            | 6             | 0           | 3.834212                | 1.230340  | -0.386766 |
| 12            | 1             | 0           | 0.452333                | -1.937469 | 0.788420  |
| 13            | 1             | 0           | -3.129084               | -0.974745 | 0.807364  |
| 14            | 1             | 0           | 2.650102                | -1.493191 | 1.272551  |
| 15            | 1             | 0           | 0.565376                | 1.216751  | -1.339056 |
| 16            | 6             | 0           | -0.006374               | -2.591936 | -1.676342 |
| 17            | 1             | 0           | -0.612944               | -2.791715 | -2.561401 |
| 18            | 1             | 0           | 1.024736                | -2.410984 | -1.991193 |
| 19            | 1             | 0           | -0.035253               | -3.449321 | -0.991204 |
| 20            | 1             | 0           | 4.739716                | -0.205465 | 0.945078  |
| 21            | 1             | 0           | 4.750810                | 1.794178  | -0.535663 |
| 22            | 1             | 0           | 2.656611                | 2.495358  | -1.679575 |
| 23            | 1             | 0           | -1.110833               | 0.923878  | 0.460430  |
| 24            | 7             | 0           | -2.729913               | 1.302569  | -0.504884 |
| 25            | 8             | 0           | -1.667853               | 1.956172  | -0.153850 |
| 26            | 8             | 0           | -3.572766               | 1.901768  | -1.145558 |
| 27            | 6             | 0           | -0.877382               | -0.111021 | 2.383891  |
| 28            | 7             | 0           | -0.780416               | 0.068445  | 3.528818  |

[3a]

| Center<br>Number | Atomic<br>Number | Atomic<br>Type | Coordinates (Angstroms) |           |           |
|------------------|------------------|----------------|-------------------------|-----------|-----------|
|                  |                  |                | X                       | Y         | Z         |
| 1                | 6                | 0              | -1.484235               | 0.972585  | 0.009324  |
| 2                | 6                | 0              | -2.602384               | 0.503914  | -0.580349 |
| 3                | 8                | 0              | -2.686687               | -0.826655 | -0.632496 |
| 4                | 7                | 0              | -1.363850               | -1.349625 | -0.189408 |
| 5                | 6                | 0              | -0.677567               | -0.221552 | 0.513992  |
| 6                | 6                | 0              | 0.805337                | -0.204892 | 0.185990  |
| 7                | 6                | 0              | 1.745408                | -0.160453 | 1.220539  |
| 8                | 6                | 0              | 1.249415                | -0.216783 | -1.143277 |
| 9                | 6                | 0              | 3.113030                | -0.122741 | 0.934847  |
| 10               | 6                | 0              | 2.613363                | -0.182575 | -1.429600 |
| 11               | 6                | 0              | 3.548969                | -0.133841 | -0.390708 |
| 12               | 1                | 0              | -0.793801               | -0.308328 | 1.607909  |
| 13               | 1                | 0              | -3.436789               | 1.039314  | -1.016954 |
| 14               | 1                | 0              | 1.407178                | -0.156403 | 2.254172  |
| 15               | 1                | 0              | 0.522886                | -0.260922 | -1.949369 |
| 16               | 6                | 0              | -1.657905               | -2.486349 | 0.676196  |
| 17               | 1                | 0              | -2.207275               | -3.238930 | 0.106329  |
| 18               | 1                | 0              | -0.695818               | -2.910217 | 0.978506  |
| 19               | 1                | 0              | -2.228495               | -2.206178 | 1.573493  |
| 20               | 1                | 0              | 3.833420                | -0.088925 | 1.747453  |
| 21               | 1                | 0              | 4.611637                | -0.106979 | -0.615640 |
| 22               | 1                | 0              | 2.948174                | -0.193676 | -2.463286 |
| 23               | 6                | 0              | -1.150731               | 2.325250  | 0.220991  |
| 24               | 7                | 0              | -0.848125               | 3.436641  | 0.407935  |

[TS2]

| Center<br>Number | Atomic<br>Number | Atomic<br>Type | Coordinates (Angstroms) |           |           |
|------------------|------------------|----------------|-------------------------|-----------|-----------|
|                  |                  |                | X                       | Y         | Z         |
| 1                | 6                | 0              | -1.486783               | 0.858308  | 0.231380  |
| 2                | 6                | 0              | -2.903998               | 0.701048  | 0.181586  |
| 3                | 8                | 0              | -3.477292               | -0.376134 | -0.023205 |
| 4                | 7                | 0              | -1.142190               | -1.233697 | -0.655806 |
| 5                | 6                | 0              | -0.682158               | -0.418341 | 0.404795  |
| 6                | 6                | 0              | 0.835410                | -0.268239 | 0.177430  |
| 7                | 6                | 0              | 1.706327                | -0.708223 | 1.179914  |
| 8                | 6                | 0              | 1.349524                | 0.246093  | -1.021896 |
| 9                | 6                | 0              | 3.086769                | -0.594177 | 1.001314  |
| 10               | 6                | 0              | 2.728540                | 0.349692  | -1.196502 |
| 11               | 6                | 0              | 3.599597                | -0.067531 | -0.185673 |
| 12               | 1                | 0              | -0.838685               | -0.850052 | 1.403153  |
| 13               | 1                | 0              | -3.495906               | 1.605071  | 0.414985  |
| 14               | 1                | 0              | 1.309862                | -1.120945 | 2.102922  |
| 15               | 1                | 0              | 0.675277                | 0.560316  | -1.811564 |
| 16               | 6                | 0              | -1.590320               | -2.555636 | -0.355756 |
| 17               | 1                | 0              | -2.464250               | -2.800580 | -0.968951 |
| 18               | 1                | 0              | -0.781757               | -3.216108 | -0.726047 |
| 19               | 1                | 0              | -1.781138               | -2.765709 | 0.702020  |
| 20               | 1                | 0              | 3.757579                | -0.918132 | 1.791760  |
| 21               | 1                | 0              | 4.673668                | 0.015442  | -0.324628 |
| 22               | 1                | 0              | 3.122692                | 0.754342  | -2.124162 |
| 23               | 6                | 0              | -0.893422               | 2.128364  | 0.167951  |
| 24               | 7                | 0              | -0.408656               | 3.193308  | 0.115648  |

[4a]

| Center<br>Number | Atomic<br>Number | Atomic<br>Type | Coordinates (Angstroms) |           |           |
|------------------|------------------|----------------|-------------------------|-----------|-----------|
|                  |                  |                | X                       | Y         | Z         |
| 1                | 6                | 0              | 1.521100                | 0.419823  | -0.215588 |
| 2                | 6                | 0              | 2.701904                | 0.021737  | -1.057341 |
| 3                | 8                | 0              | 3.176179                | -1.096944 | -1.067999 |
| 4                | 7                | 0              | 1.280673                | -0.115902 | 1.143178  |
| 5                | 6                | 0              | 0.484839                | -0.692823 | 0.105190  |
| 6                | 6                | 0              | -0.986283               | -0.455752 | 0.055787  |
| 7                | 6                | 0              | -1.743142               | -1.104208 | -0.930574 |
| 8                | 6                | 0              | -1.627598               | 0.390604  | 0.970138  |
| 9                | 6                | 0              | -3.121277               | -0.903573 | -1.006494 |
| 10               | 6                | 0              | -3.006426               | 0.588859  | 0.893086  |
| 11               | 6                | 0              | -3.755757               | -0.055031 | -0.095182 |
| 12               | 1                | 0              | 0.818764                | -1.650779 | -0.299459 |
| 13               | 1                | 0              | 3.118319                | 0.833254  | -1.683080 |
| 14               | 1                | 0              | -1.250991               | -1.768183 | -1.637112 |
| 15               | 1                | 0              | -1.041640               | 0.878935  | 1.742178  |
| 16               | 6                | 0              | 2.313088                | -0.913399 | 1.815593  |
| 17               | 1                | 0              | 3.068418                | -0.234183 | 2.219699  |
| 18               | 1                | 0              | 1.821724                | -1.425532 | 2.647575  |
| 19               | 1                | 0              | 2.795656                | -1.651557 | 1.167813  |
| 20               | 1                | 0              | -3.699002               | -1.411509 | -1.773538 |
| 21               | 1                | 0              | -4.829624               | 0.099622  | -0.152127 |
| 22               | 1                | 0              | -3.496730               | 1.243372  | 1.608354  |
| 23               | 6                | 0              | 1.079843                | 1.786579  | -0.405177 |
| 24               | 7                | 0              | 0.737030                | 2.882364  | -0.582168 |

[TS3]

| Center<br>Number | Atomic<br>Number | Atomic<br>Type | Coordinates (Angstroms) |           |           |
|------------------|------------------|----------------|-------------------------|-----------|-----------|
|                  |                  |                | X                       | Y         | Z         |
| 1                | 6                | 0              | 1.349300                | 0.778834  | -0.644205 |
| 2                | 6                | 0              | 2.620688                | 0.343883  | 0.320880  |
| 3                | 8                | 0              | 3.768130                | -0.026298 | 0.046368  |
| 4                | 7                | 0              | 1.470268                | -0.891744 | 0.488308  |
| 5                | 6                | 0              | 0.517422                | -0.456328 | -0.586866 |
| 6                | 6                | 0              | -0.946900               | -0.372406 | -0.229394 |
| 7                | 6                | 0              | -1.905406               | -0.533166 | -1.236760 |
| 8                | 6                | 0              | -1.360386               | -0.116877 | 1.084660  |
| 9                | 6                | 0              | -3.264843               | -0.429831 | -0.936442 |
| 10               | 6                | 0              | -2.719537               | -0.020484 | 1.383207  |
| 11               | 6                | 0              | -3.674084               | -0.173773 | 0.373889  |
| 12               | 1                | 0              | 0.658150                | -1.085631 | -1.472197 |
| 13               | 1                | 0              | 2.463924                | 1.057301  | 1.159021  |
| 14               | 1                | 0              | -1.589663               | -0.739626 | -2.256351 |
| 15               | 1                | 0              | -0.618194               | -0.012133 | 1.870357  |
| 16               | 6                | 0              | 2.144948                | -2.133301 | 0.114701  |
| 17               | 1                | 0              | 2.844286                | -2.392085 | 0.913707  |
| 18               | 1                | 0              | 1.370876                | -2.901300 | 0.007502  |
| 19               | 1                | 0              | 2.714226                | -2.059570 | -0.821030 |
| 20               | 1                | 0              | -4.001516               | -0.556798 | -1.724535 |
| 21               | 1                | 0              | -4.731993               | -0.099245 | 0.609293  |
| 22               | 1                | 0              | -3.032802               | 0.171071  | 2.405609  |
| 23               | 6                | 0              | 0.757885                | 2.013916  | -0.260473 |
| 24               | 7                | 0              | 0.338753                | 3.095403  | -0.111377 |



[2a]

| Center Number | Atomic Number | Atomic Type | Coordinates (Angstroms) |           |           |
|---------------|---------------|-------------|-------------------------|-----------|-----------|
|               |               |             | X                       | Y         | Z         |
| 1             | 6             | 0           | 1.429731                | 0.711609  | 0.549889  |
| 2             | 6             | 0           | 2.121114                | -0.685459 | 0.389690  |
| 3             | 8             | 0           | 3.113439                | -1.208867 | 0.850529  |
| 4             | 7             | 0           | 1.164971                | -1.093106 | -0.483553 |
| 5             | 6             | 0           | 0.429068                | 0.184280  | -0.554736 |
| 6             | 6             | 0           | -1.038802               | 0.142892  | -0.211565 |
| 7             | 6             | 0           | -1.938137               | 0.945191  | -0.924169 |
| 8             | 6             | 0           | -1.521865               | -0.672301 | 0.822226  |
| 9             | 6             | 0           | -3.297256               | 0.943373  | -0.604038 |
| 10            | 6             | 0           | -2.880123               | -0.677834 | 1.139527  |
| 11            | 6             | 0           | -3.770870               | 0.131569  | 0.428587  |
| 12            | 1             | 0           | 0.582585                | 0.688317  | -1.514859 |
| 13            | 1             | 0           | 0.958599                | 0.835654  | 1.528921  |
| 14            | 1             | 0           | -1.572861               | 1.573576  | -1.732901 |
| 15            | 1             | 0           | -0.836698               | -1.309676 | 1.375235  |
| 16            | 6             | 0           | 1.016120                | -2.317156 | -1.241972 |
| 17            | 1             | 0           | 1.759502                | -3.030673 | -0.880217 |
| 18            | 1             | 0           | 0.015210                | -2.735613 | -1.098988 |
| 19            | 1             | 0           | 1.180250                | -2.135674 | -2.310128 |
| 20            | 1             | 0           | -3.984281               | 1.570978  | -1.164672 |
| 21            | 1             | 0           | -4.828707               | 0.125318  | 0.676002  |
| 22            | 1             | 0           | -3.243515               | -1.315734 | 1.940348  |
| 23            | 6             | 0           | 2.233675                | 1.874658  | 0.223495  |
| 24            | 7             | 0           | 2.887384                | 2.795898  | -0.048529 |

### [3] References

- [S1] A. D. Becke, *J. Chem. Phys.*, 1993, **98**, 5648-5652.
- [S2] M. J. Frisch, G. W. Trucks, H. B. Schlegel, G. E. Scuseria, M. A. Robb, J. R. Cheeseman, G. Scalmani, V. Barone, B. Mennucci, G. A. Petersson, H. Nakatsuji, M. Caricato, X. Li, H. P. Hratchian, A. F. Izmaylov, J. Bloino, G. Zheng, J. L. Sonnenberg, M. Hada, M. Ehara, K. Toyota, R. Fukuda, J. Hasegawa, M. Ishida, T. Nakajima, Y. Honda, O. Kitao, H. Nakai, T. Vreven, J. A. Montgomery, Jr., J. E. Peralta, F. Ogliaro, M. Bearpark, J. J. Heyd, E. Brothers, K. N. Kudin, V. N. Staroverov, R. Kobayashi, J. Normand, K. Raghavachari, A. Rendell, J. C. Burant, S. S. Iyengar, J. Tomasi, M. Cossi, N. Rega, J. M. Millam, M. Klene, J. E. Knox, J. B. Cross, V. Bakken, C. Adamo, J. Jaramillo, R. Gomperts, R. E. Stratmann, O. Yazyev, A. J. Austin, R. Cammi, C. Pomelli, J. W. Ochterski, R. L. Martin, K. Morokuma, V. G. Zakrzewski, G. A. Voth, P. Salvador, J. J. Dannenberg, S. Dapprich, A. D. Daniels, O. Farkas, J. B. Foresman, J. V. Ortiz, J. Cioslowski, and D. J. Fox, *Gaussian 09, Revision A.1*, Gaussian, Inc., Wallingford CT, 2009.
